# Supplementary material for: Layer by layer solution processed organic solar cells based on a small molecule donor and a polymer acceptor
Source: Royal Society of Chemistry journal article supplement (doi:10.1039/c4tc02103g), 2014-11-19
Supplement: c4tc02103g1.pdf [file c4tc02103g1.pdf]

Electronic Supplementary Information for:

**Layer by layer solution processed organic solar cells based on small molecule donor and polymer acceptor**

Yifan Wang,<sup>ac</sup> Xingang Zhao,<sup>a</sup> and Xiaowei Zhan<sup>\*b</sup>

<sup>a</sup> *Beijing National Laboratory for Molecular Sciences and Key Laboratory of Organic Solids, Institute of Chemistry, Chinese Academy of Sciences, Beijing 100190, China.*

<sup>b</sup> *Department of Materials Science and Engineering, College of Engineering, Peking University, Beijing 100871, China. E-mail: xwzhan@pku.edu.cn*

<sup>c</sup> *University of Chinese Academy of Sciences, Beijing 100049, China.*

## Calculation of DIB-SQ weight content from XPS

$$\begin{aligned}
 \text{DIB - SQ weight content} &= \frac{\text{DIB - SQ weight}}{\text{DIB - SQ weight} + \text{PPDIDTT weight}} \\
 &= \frac{n_{sq}M_{sq}}{n_{sq}M_{sq} + n_P M_P} \\
 &= \frac{1}{1 + \frac{n_P M_P}{n_{sq} M_{sq}}}
 \end{aligned}$$

$$\frac{N}{S} = \frac{2n_P + 2n_{sq}}{3n_P}$$

↓

$$\frac{n_{sq}}{n_P} = 1.5 \frac{N}{S} - 1$$

$$\text{DIB - SQ weight content} = \frac{1}{\left( \frac{M_P}{M_{sq} \left( 1.5 \frac{N}{S} - 1 \right)} \right) + 1}$$

Where  $M_P$  is the molecular weight of repeated unit of PPDIDTT (1288);  $M_{sq}$  is the molecular weight of DIB-SQ (554);  $n_P$  is the mole number of repeated unit of PPDIDTT;  $n_{sq}$  is the mole number of DIB-SQ;  $\frac{N}{S}$  is the atom ratio of N/S. A DIB-SQ molecule has two N atoms while a repeated unit of PPDIDTT has two N atoms and three S atoms.

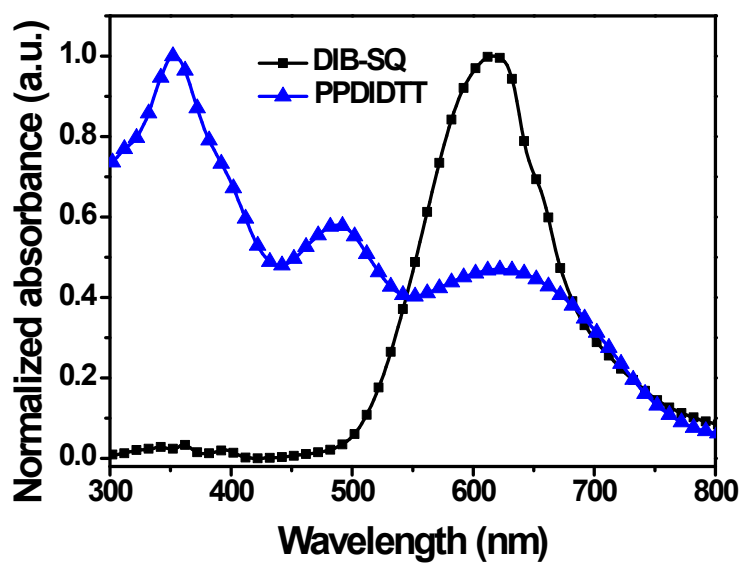

**Fig. S1** UV-vis spectra of DIB-SQ and PPDIDTT films.

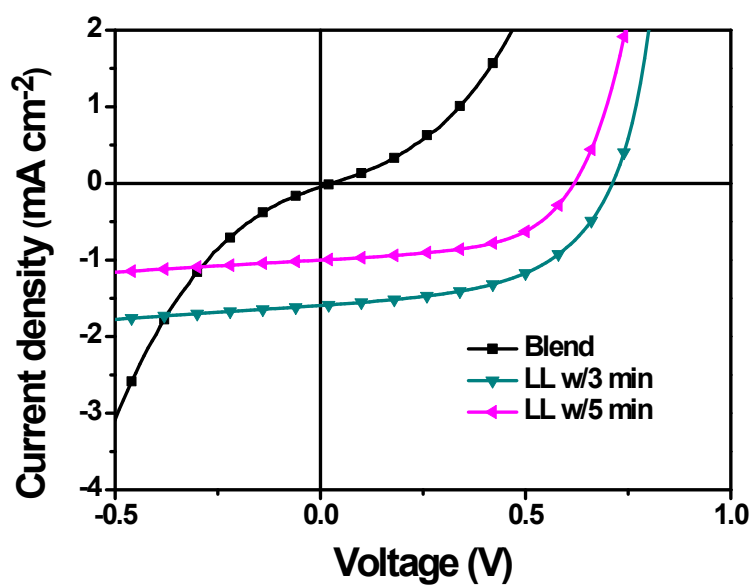

**Fig. S2**  $J-V$  characteristics of DIB-SQ/PPDIDTT blend devices and LL devices after thermal annealing at 100 °C for 3 min and 5 min.

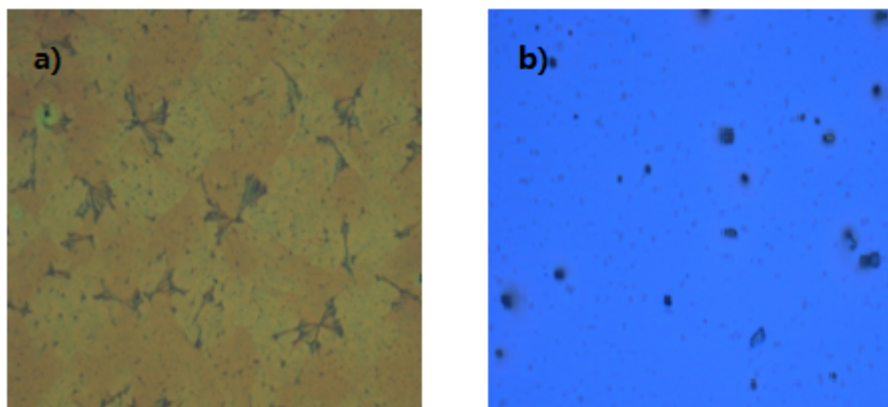

**Fig. S3** Optical microscope images of a) DIB-SQ film ( $250\ \mu\text{m} \times 250\ \mu\text{m}$ ) and b) DIB-SQ/PPDIDTT (2:1) blend film ( $250\ \mu\text{m} \times 250\ \mu\text{m}$ ) on silica glass substrates.

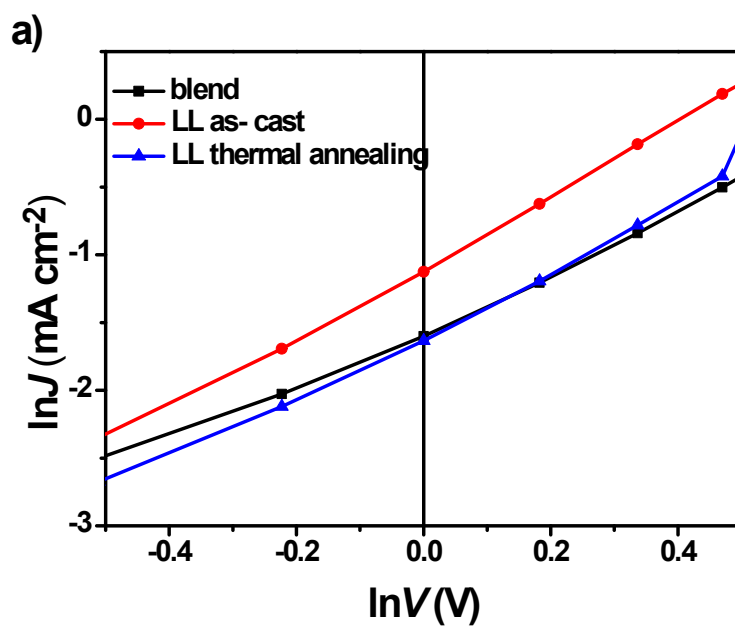

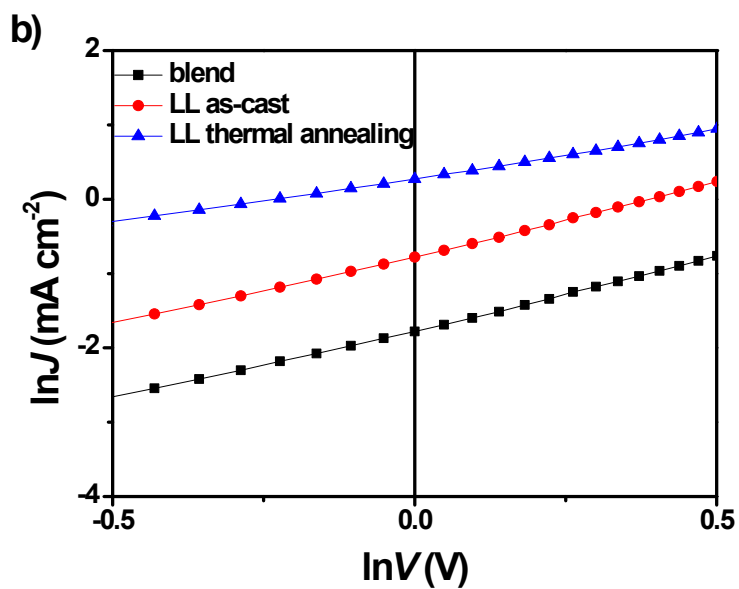

**Fig. S4**  $J$ - $V$  characteristics under dark for a) hole-only and b) electron-only devices based on DIB-SQ/PPDIDTT blend and LL films with or without thermal annealing at 100 °C for 1 min.
